# Supplementary material for: Identification of Single Yeast Budding Using Impedance Cytometry with a Narrow Electrode Span
Source: MDPI journal article supplement (doi:10.3390/s22207743), 2022-10-12
Supplement: s1 [file s1]

## Supporting information

### Identification of Single Yeast Budding Using Impedance Cytometry with a Narrow Electrode Span

Xun Liu <sup>1</sup>, Tao Tang <sup>1,\*</sup>, Po-Wei Yi <sup>1,2</sup>, Yapeng Yuan <sup>3</sup>, Cheng Lei <sup>4</sup>, Ming Li <sup>5</sup>, Yo Tanaka <sup>3</sup>, Yoichiroh Hosokawa <sup>1</sup> and Yaxiaer Yalikun <sup>1,\*</sup>

<sup>1</sup> Division of Materials Science, Nara Institute of Science and Technology, 8916-5 Takayama-cho, Ikoma 630-0192, Nara, Japan

<sup>2</sup> Department of Applied Chemistry, National Yang Ming Chiao Tung University, Hsinchu 30010, Taiwan

<sup>3</sup> Center for Biosystems Dynamics Research (BDR), RIKEN, 1-3 Yamadaoka, Suita 565-0871, Osaka, Japan

<sup>4</sup> The Institute of Technological Sciences, Wuhan University, Wuhan 430072, China

<sup>5</sup> School of Engineering, Macquarie University, Sydney 2109, Australia

\* Correspondence: tang.tao.ts3@ms.naist.jp (T.T.); yaxiaer@ms.naist.jp (Y.Y.)

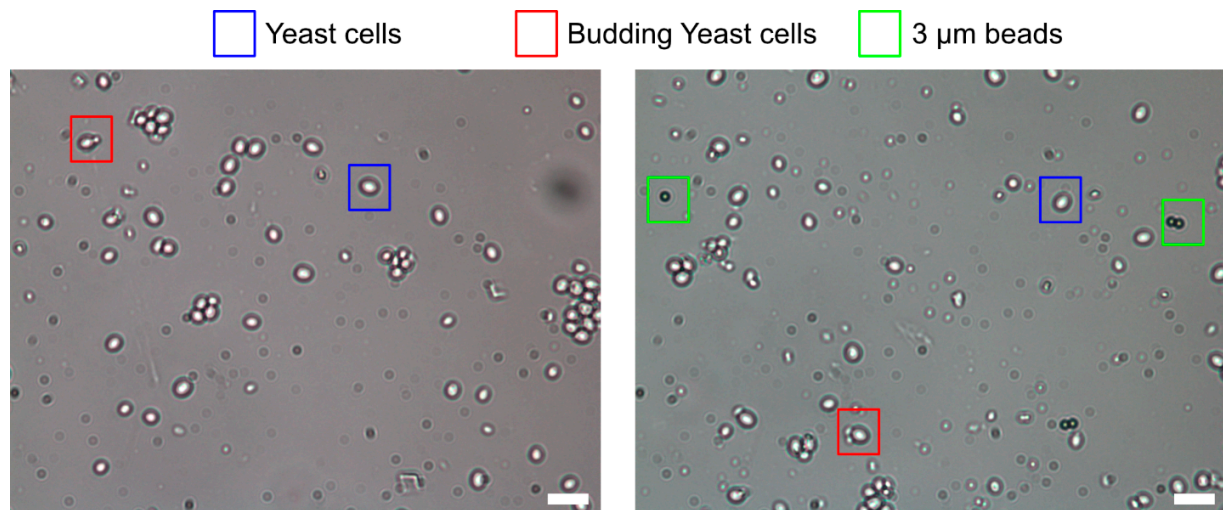

**Figure S1.** The photos of yeast sample in experiments, three kinds of objects are marked in pictures; the number of budding yeasts is lower than normal yeast cells. In the two photos, there are about 7 budding cells and more than 80 yeast cells, the ratio is about 1:10.
